# Supplementary material for: CD133 initiates tumors, induces epithelial-mesenchymal transition and increases metastasis in pancreatic cancer
Source: PubMed Central journal article supplement (PMC4480754; doi:10.18632/oncotarget.3228), 2015-03-16
Supplement: oncotarget-06-8313-s001.pdf [file oncotarget-06-8313-s001.pdf]

## SUPPLEMENTARY FIGURES

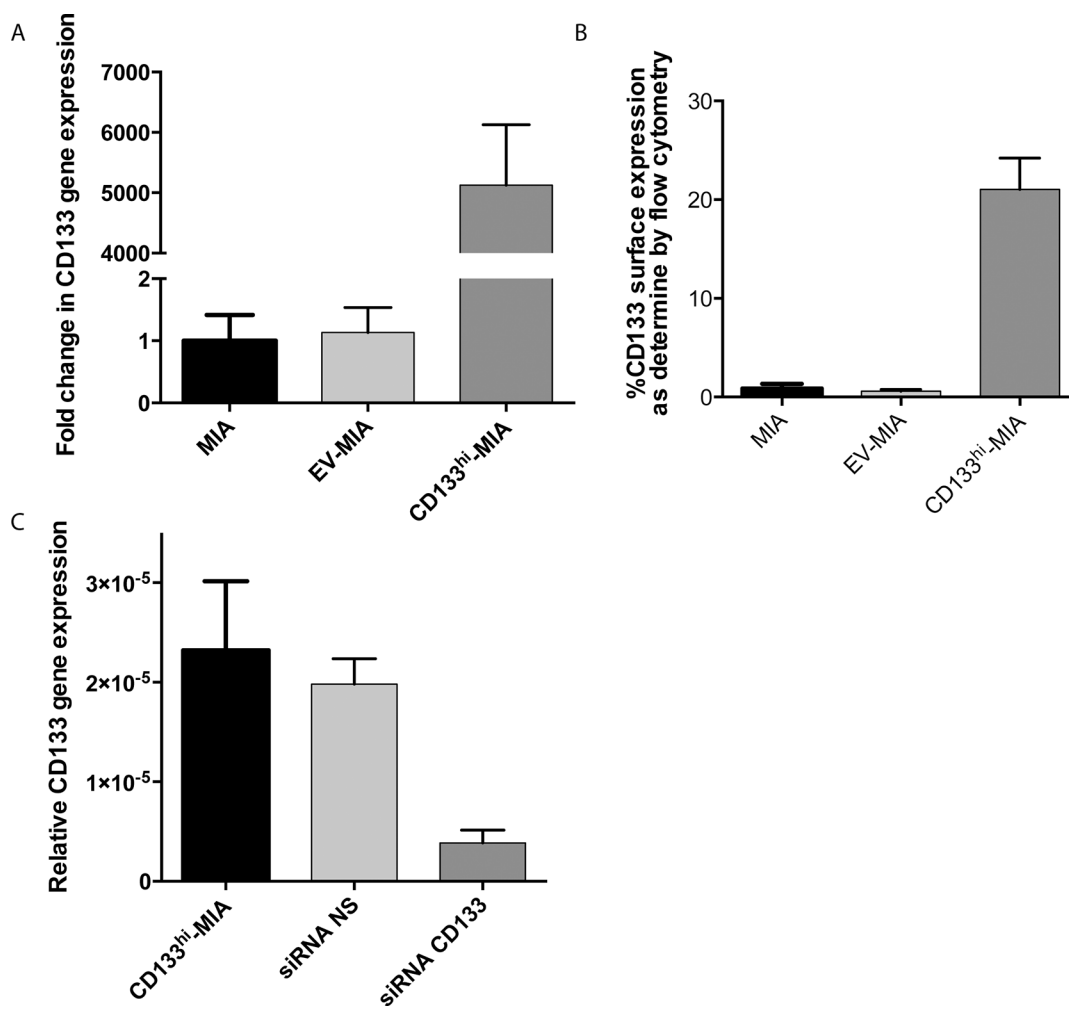

**Supplementary Figure 1: CD133 overexpression in stable cell lines.** (A) Gene expression in MIA, EV-MIA, and CD133<sup>hi</sup>-MIA stable cell lines, (B) surface CD133 expression as determined by flow cytometry, and (C) CD133 gene expression upon CD133 siRNA silencing.

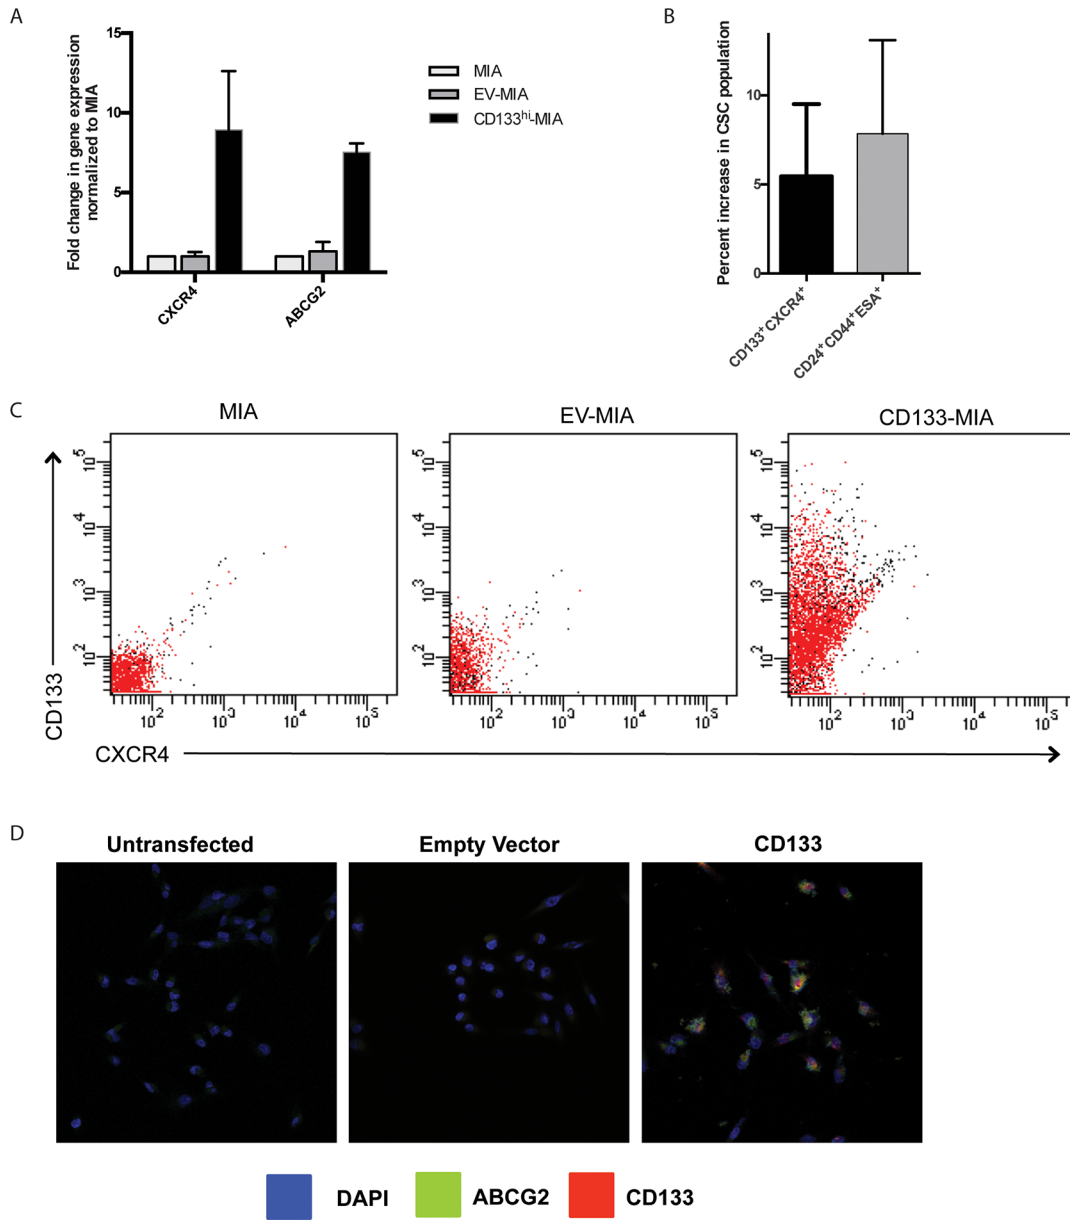

**Supplementary Figure 2: CD133 overexpression increases cancer stem cell markers.** (A) RNA expression of CXCR4 and ABCG2, (B) surface expression of CD133 and CXCR4 by flow cytometry, and (C) surface expression of ABCG2 by immunofluorescence.

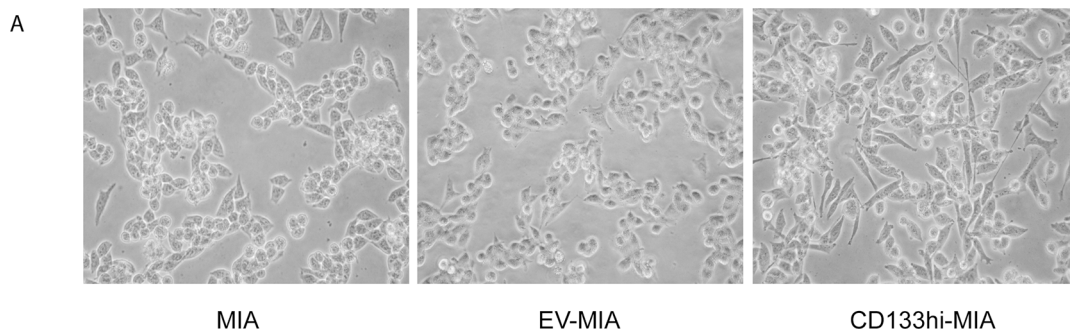

**Supplementary Figure 3: CD133 overexpression induces a more fibroblast-like morphology.** (A) Representative images of MIA, EV-MIA, and CD133<sup>hi</sup>-MIA cell lines.

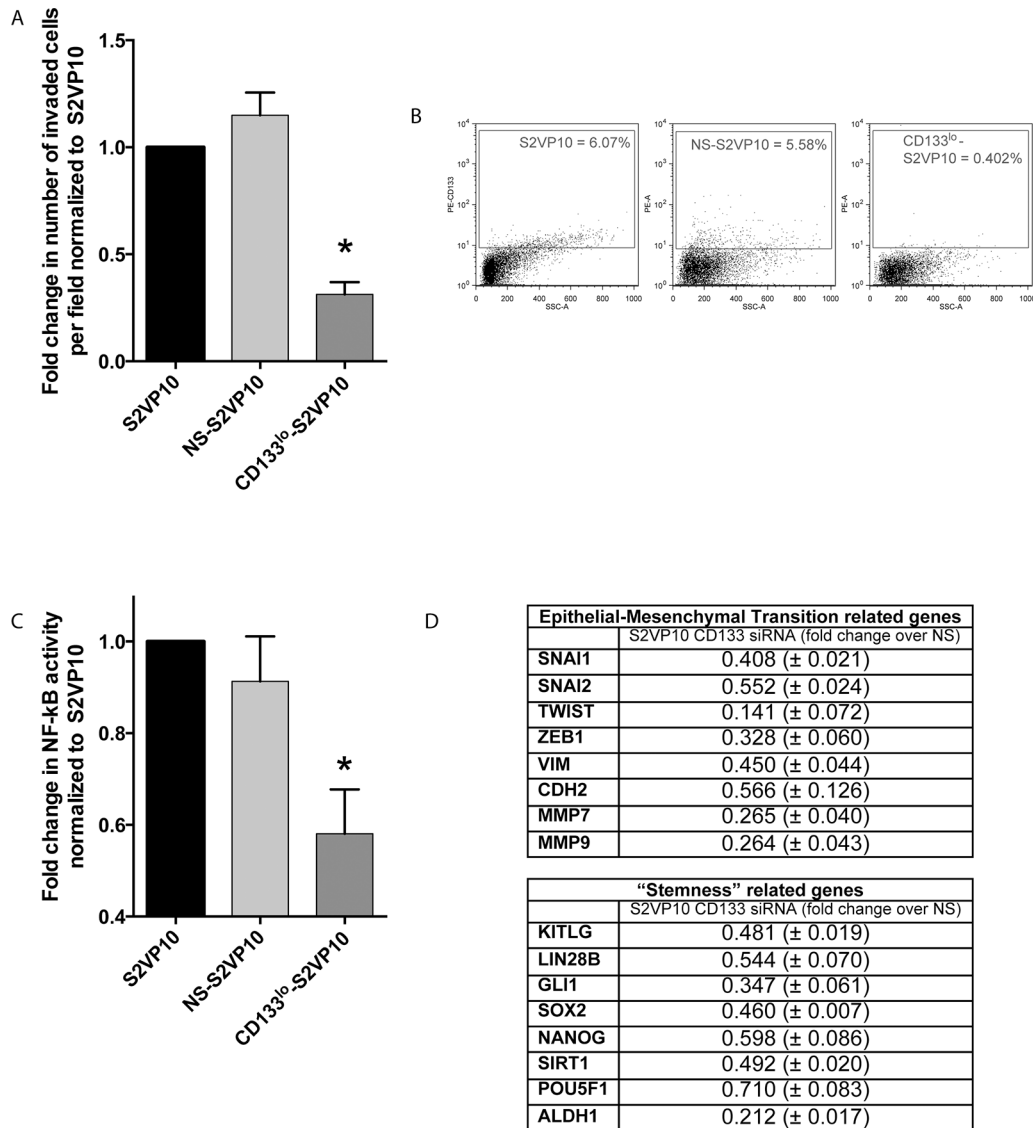

**Supplementary Figure 4: Silencing CD133 decreases invasion and NF-κB activity.** (A) *In vitro* invasion represented as fold change normalized to S2-Vp10 control compared to LV-shRNA-αCD133 knockdown cell lines. (B) CD133 surface expression as determined by flow cytometry. (C) NF-κB activity in S2-Vp10 and shRNA derivatives by dual-luciferase assay. (D) Gene expression changes in EMT and "stemness" related genes upon silencing of CD133.

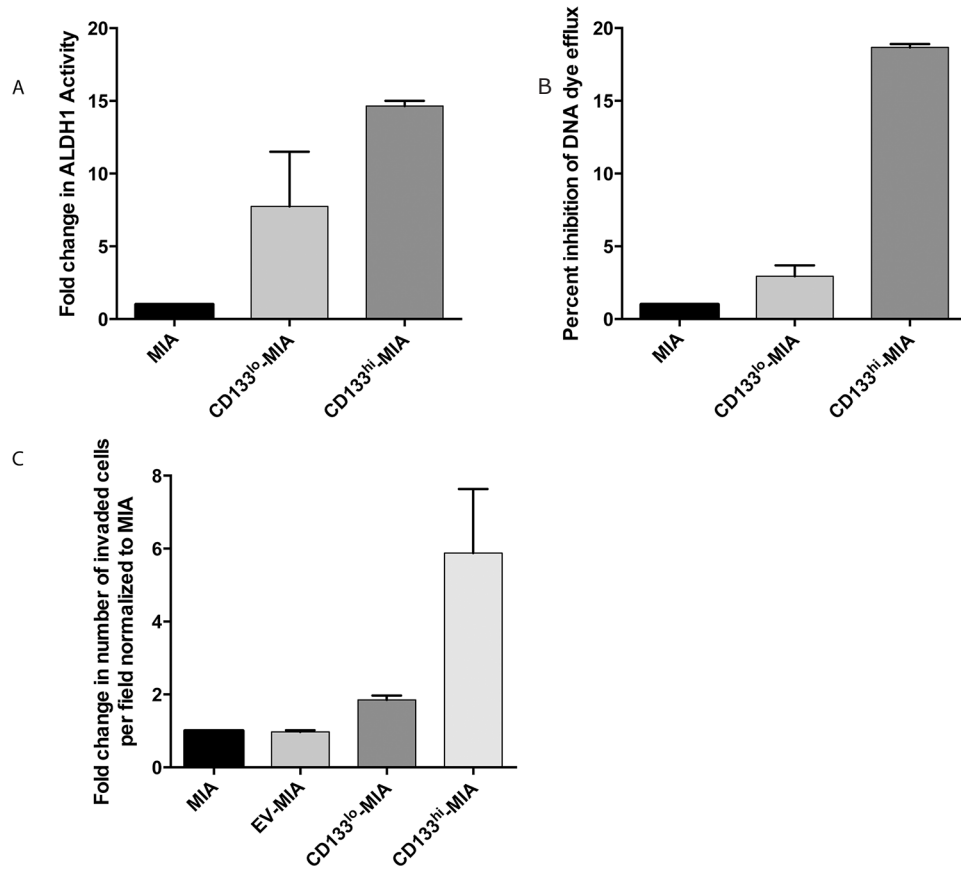

**Supplementary Figure 5: Degree of CD133 surface overexpression correlates with “stemness” and invasion.** (A) ALDH1 activity as measured by flow cytometry, (B) Dye efflux potential as determined by flow cytometry, and (C) *in vitro* invasion by Boyden chamber invasion assay.
